# Supplementary material
Source: PubMed Central journal article supplement (PMC1062887)
Supplement: pnas_102_10_3697__8.pdf [file pnas_102_10_3697__8.pdf]

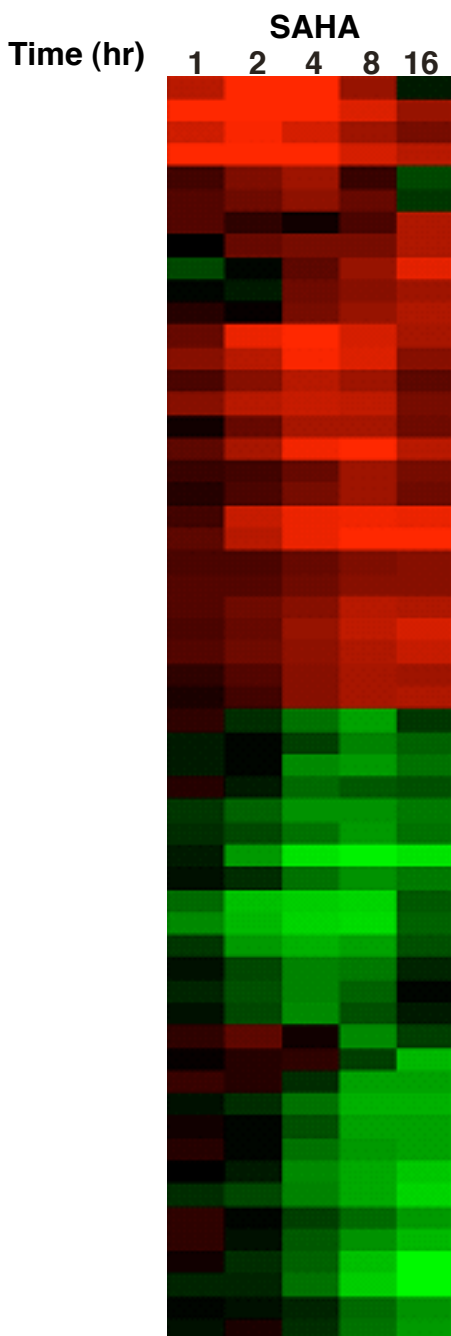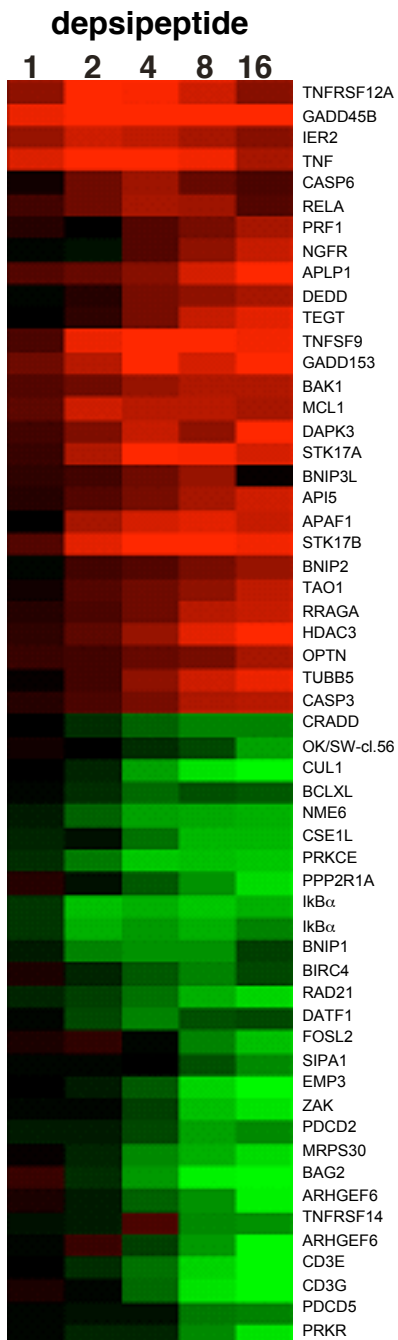

TNFRSF12A  
 GADD45B  
 IER2  
 TNF  
 CASP6  
 RELA  
 PRF1  
 NGFR  
 APLP1  
 DEDD  
 TEGT  
 TNFSF9  
 GADD153  
 BAK1  
 MCL1  
 DAPK3  
 STK17A  
 BNIP3L  
 API5  
 APAF1  
 STK17B  
 BNIP2  
 TAO1  
 RRAGA  
 HDAC3  
 OPTN  
 TUBB5  
 CASP3  
 CRADD  
 OK/SW-cl.56  
 CUL1  
 BCLXL  
 NME6  
 CSE1L  
 PRKCE  
 PPP2R1A  
 Ikb $\alpha$   
 Ikb $\alpha$   
 BNIP1  
 BIRC4  
 RAD21  
 DATF1  
 FOSL2  
 SIPA1  
 EMP3  
 ZAK  
 PDCD2  
 MRPS30  
 BAG2  
 ARHGEF6  
 TNFRSF14  
 ARHGEF6  
 CD3E  
 CD3G  
 PDCD5  
 PRKR
