# Supplementary material
Source: PubMed Central journal article supplement (PMC1062887)

**Genes regulated in  
cycling cells**

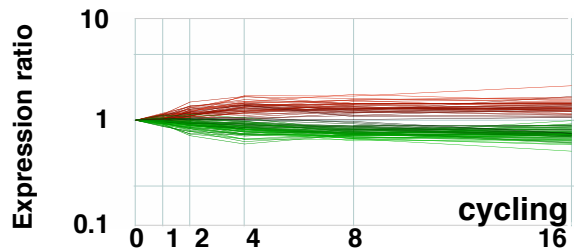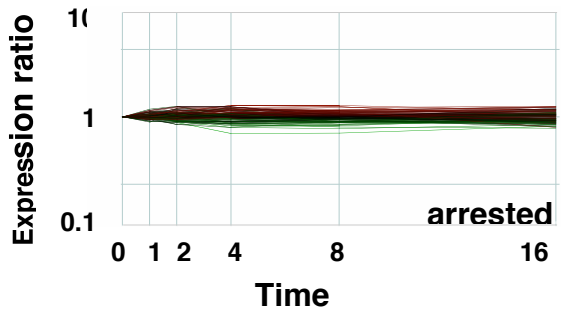

**Genes regulated in  
arrested cells**

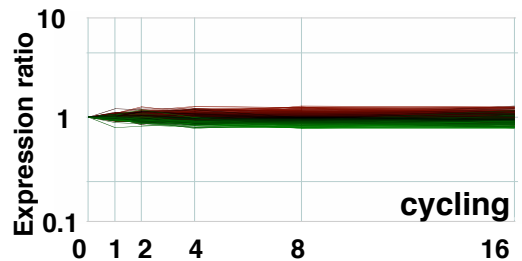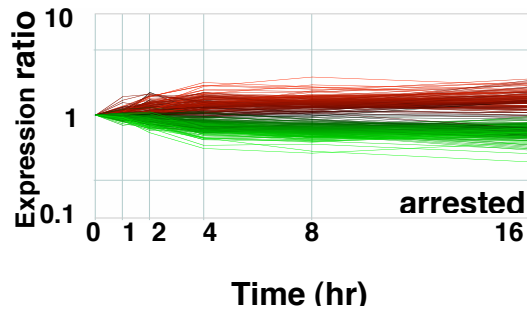

Supplement: pnas_102_10_3697__10.pdf [file pnas_102_10_3697__10.pdf]

**A**

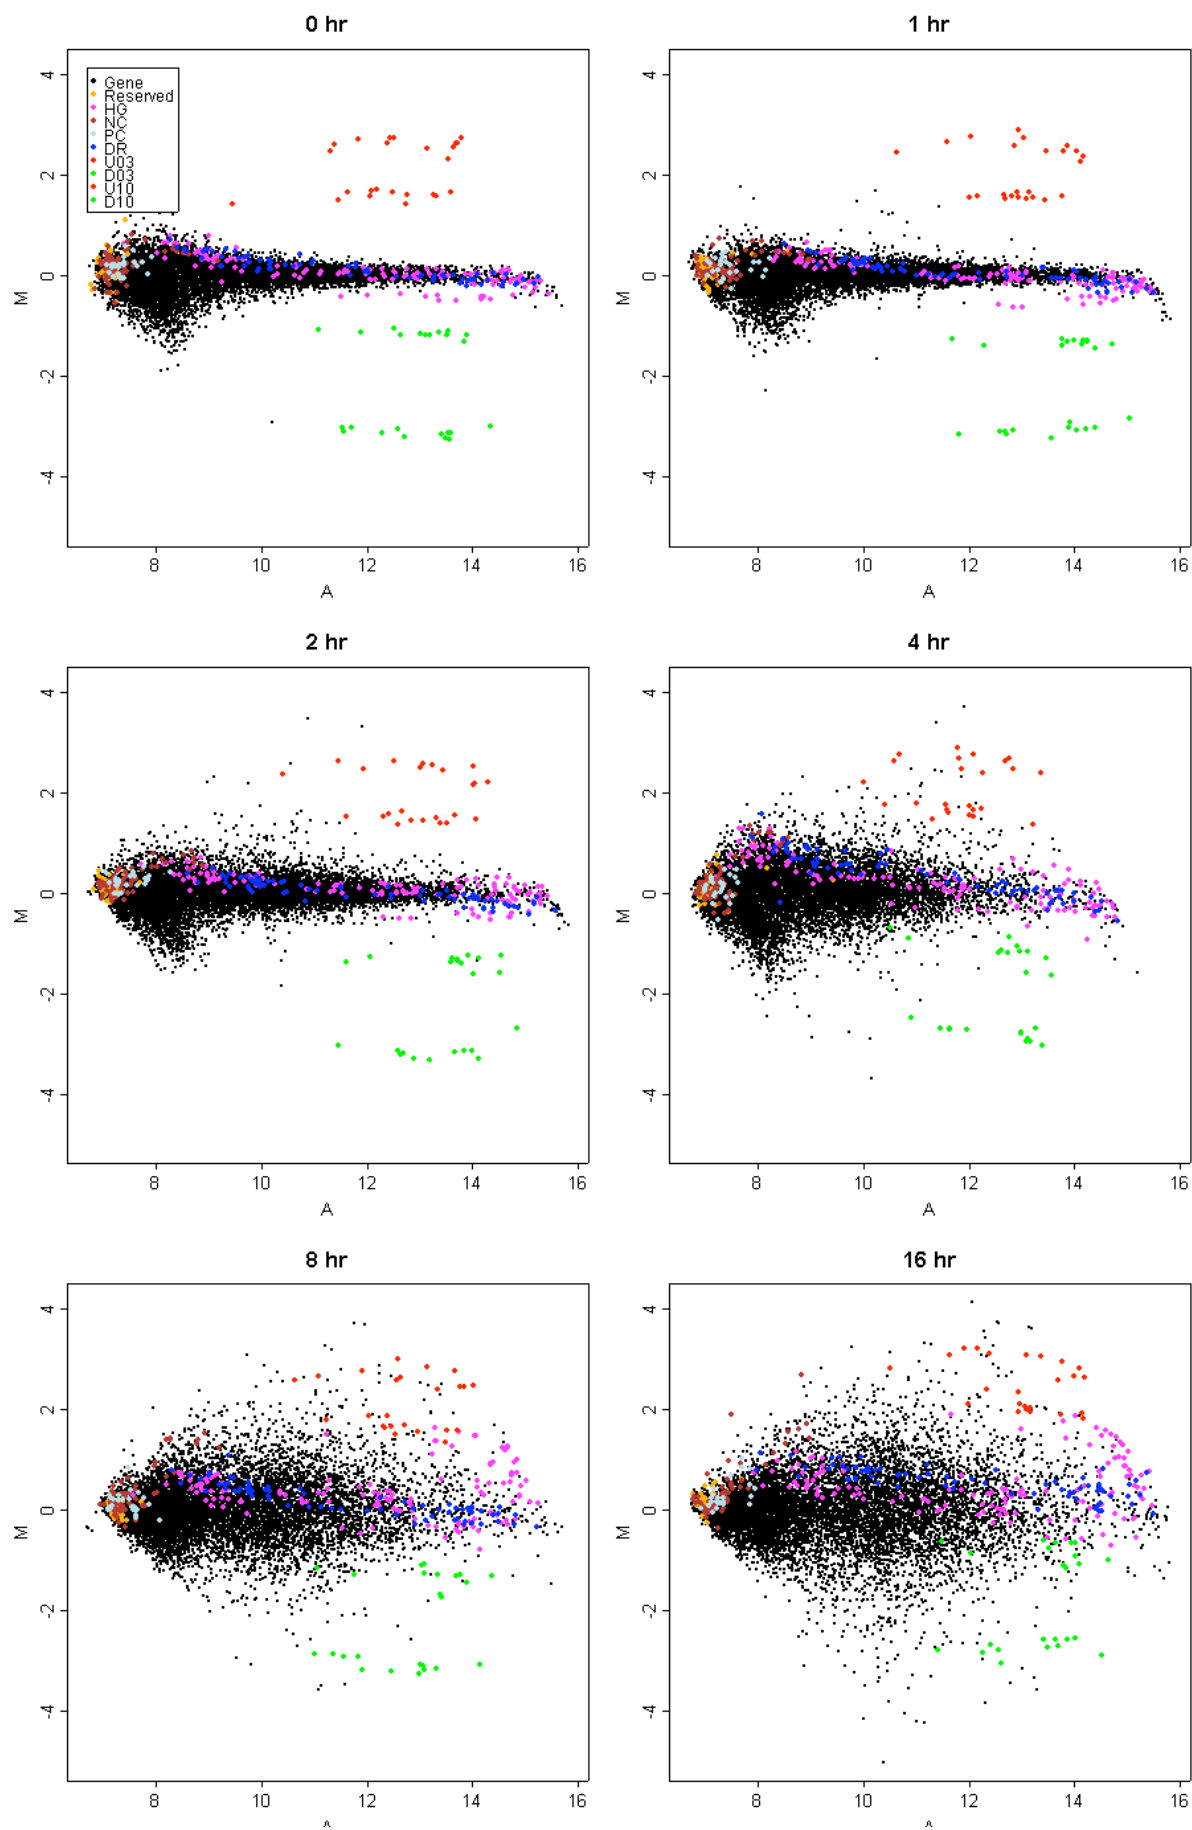

# B

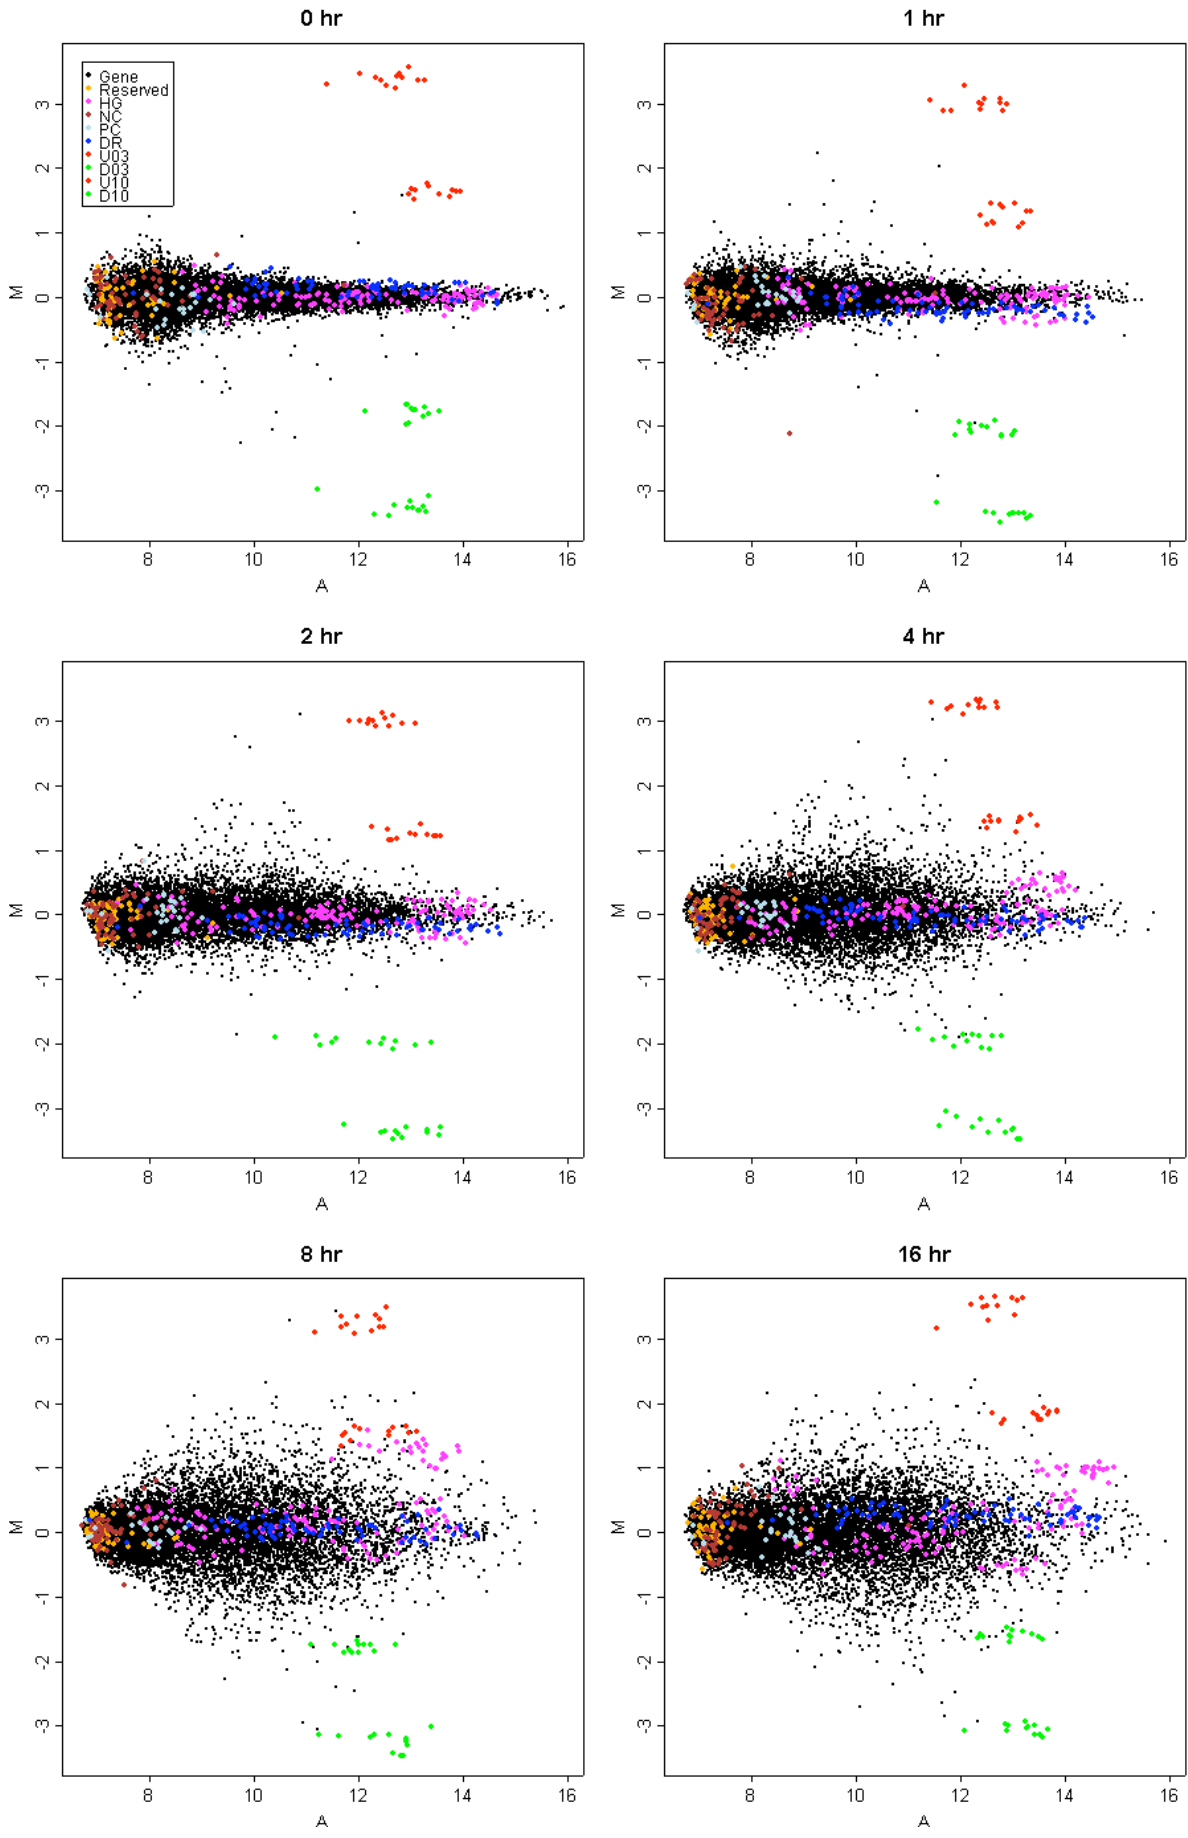

Supplement: pnas_102_10_3697__2.pdf [file pnas_102_10_3697__2.pdf]

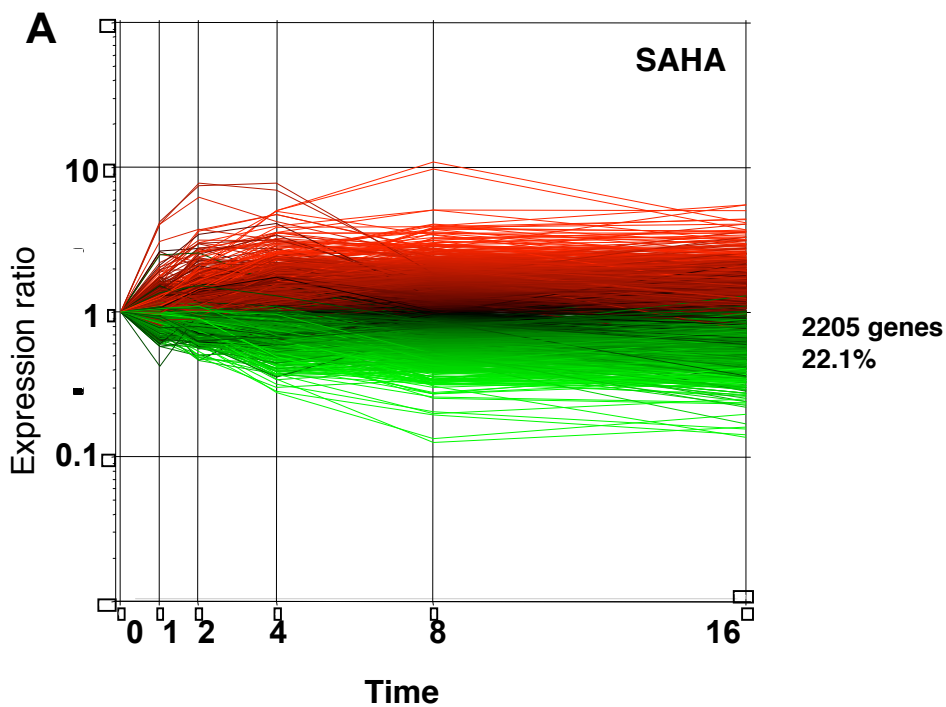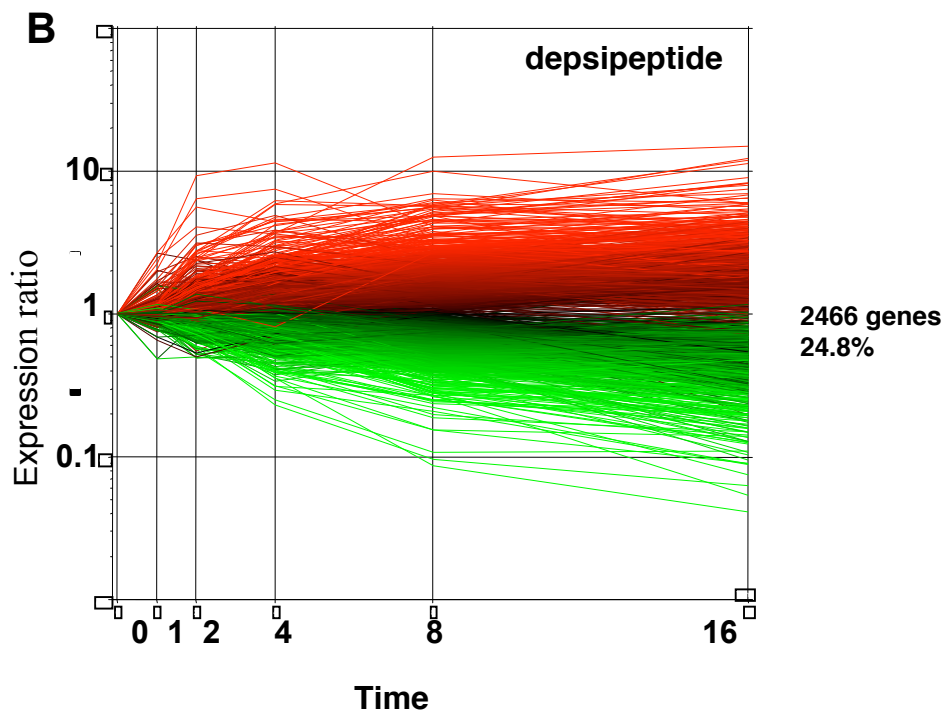

Supplement: pnas_102_10_3697__3.pdf [file pnas_102_10_3697__3.pdf]

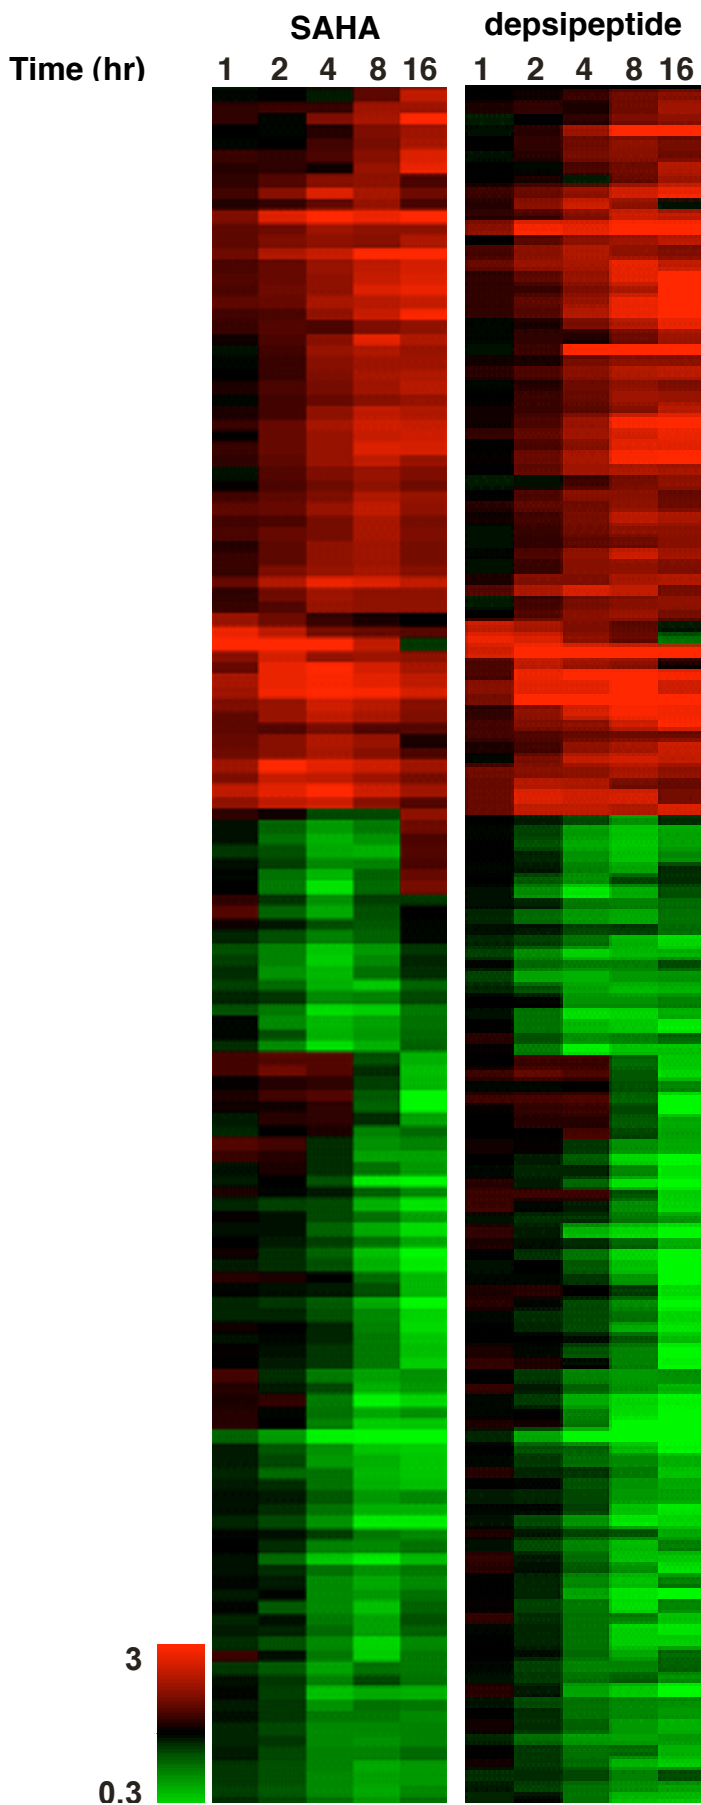

Supplement: pnas_102_10_3697__6.pdf [file pnas_102_10_3697__6.pdf]

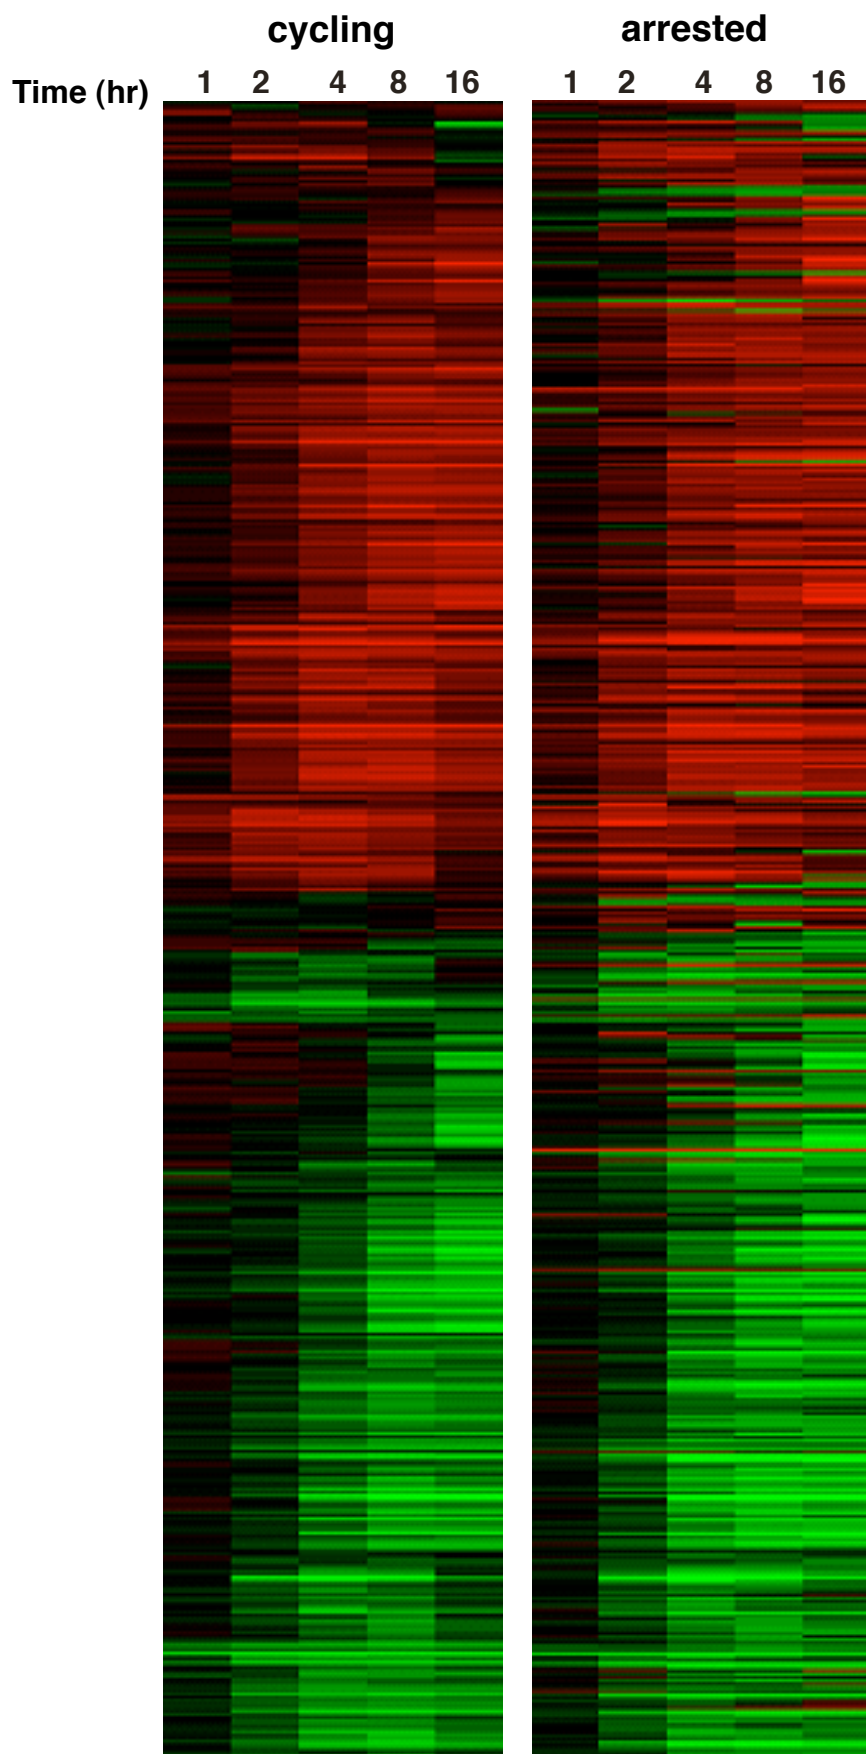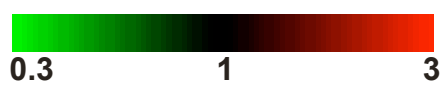

Supplement: pnas_102_10_3697__9.pdf [file pnas_102_10_3697__9.pdf]
